# Supplementary material
Source: Elsevier journal article supplement (https://www.sciencedirect.com/science/article/pii/S0211563822000281)
Supplement: mmc1 [file S0211563822000281:mmc1.doc]

**ANEXO I.** Consentimiento Informado.

**LEA ESTA HOJA INFORMATIVA DETENIDAMENTE**

Desde el área de Fisioterapia de la Universidad de (*información cegada*), le invitamos a participar en el *Estudio de Validación de Pulseras de Actividad TOMTOM TOUCH FITNESS TRACKER ®*; tratándose de un estudio financiado por la Beca de Investigación del Colegio Profesional de Fisioterapia de (*información cegada*)2018 en colaboración con la Universidad de (*información cegada*)

**Objetivo del estudio:** Se le ha invitado a participar en un estudio cuyo objetivo principal es estudiar la validez de la pulsera de actividad TOMTOM TOUCH FITNESS TRACKER como instrumento de registro objetivo de determinados parámetros relacionados con la práctica de actividades deportivas (frecuencia cardíaca, pasos totales realizados, distancia recorrida o calorías consumidas)

**Procedimientos del estudio:** En caso de aceptar participar en el estudio, se le realizarán una serie de pruebas físicas en el laboratorio de actividad física comparando el registro obtenido por la pulsera TOMTOM TOUCH FITNESS TRACKER ® con un modelo de la marca comercial POLAR ® ya analizado y validado su uso científico. A continuación, se procederá a monitorizar su rutina física habitual en un periodo de 24 horas.

**Beneficios del estudio:** A través de la monitorización de la rutina diaria con el dispositivo mencionado, se pretende objetivar su validez como instrumento medidor de los parámetros de la actividad física y usted podrá obtener un registro individualizado de su actividad habitual.

**Riesgos asociados al estudio:** No existen riesgos añadidos por participar en el estudio.

**Aclaraciones:**

- No recibirá ninguna consecuencia desfavorable en caso de no participar en la investigación.
- Si decida participar, podrá retirarse en el momento que desee.
- No tendrá que hacer gasto alguno durante la intervención.
- No recibirá pago por su participación.
- La información personal de cada participante será mantenida en estricta confidencialidad por el grupo de investigadores, de tal manera que ninguna persona ajena pueda acceder a esta información y atendiendo a un estricto cumplimiento de la Ley Orgánica 15/1999 sobre la Protección de Datos de Carácter Personal. En ningún caso se harán públicos sus datos personales, siempre garantizando la plena confidencialidad de los mismos y el riguroso cumplimiento del secreto profesional en el uso y manejo de la información y el material obtenidos.
- Los resultados obtenidos serán confidenciales y tendrán un fin investigador
- La aceptación de estos términos y condiciones implica el compromiso de devolución de la pulsera de actividad al equipo investigador cuando concluya el periodo experimental.

**CONSENTIMIENTO INFORMADO**

En (*información cegada*) a …… de …………..………. del 2018

DON...................................................................................................................................., mayor de edad y con Documento Nacional de Identidad o Pasaporte...................................................., por medio del presente escrito

- He leído la hoja informativa que me ha sido entregada
- He tenido oportunidad de efectuar preguntas sobre el estudio.
- He recibido respuestas satisfactorias.
- He recibido suficiente información en relación con el estudio.
- He hablado con los investigadores responsables
- Entiendo que la participación es voluntaria.
- Entiendo que puedo abandonar el estudio:
  - Cuando lo desee.
  - Sin que tenga que dar explicaciones.

También he sido informado de forma clara, precisa y suficiente de los siguientes extremos que afectan a los datos personales que se contienen en este consentimiento y en la ficha o expediente que se abra para la investigación:

•Estos datos serán tratados y custodiados con respeto a mi intimidad y a la vigente normativa de protección de datos.

•Sobre estos datos me asisten los derechos de acceso, rectificación, cancelación y oposición que podré ejercitar mediante solicitud ante el investigador responsable en la dirección de contacto que figura en este documento.

**•Estos datos no podrán ser cedidos sin mi consentimiento expreso y no lo otorgo en este acto.**

Declaro que he leído y conozco el contenido del presente documento, comprendo los compromisos que asumo y los acepto expresamente. Conozco y asumo además que la aceptación de este consentimiento informado implica la devolución del dispositivo de actividad que se me entregará al transcurrir el periodo experimental.

A continuación, procedo a firmar el compromiso de entrega y devolución de la pulsera de actividad TOMTOM TOUCH FITNESS TRACKER ® en el periodo señalado por los investigadores.

Por ello, firmo este consentimiento informado de forma voluntaria para VALIDAR LA PULSERA DE ACTIVIDAD MODELO TOMTOM TOUCH FITNESS TRACKER ®, hasta que decida lo contrario. Al firmar este consentimiento no renuncio a ninguno de mis derechos. Recibiré una copia de este consentimiento para guardarlo y poder consultarlo en el futuro.

| Firma: | Fecha: |
| --- | --- |

A continuación, procedo a firmar el compromiso de entrega y devolución de la pulsera de actividad TOMTOM TOUCH FITNESS TRACKER ® en el periodo señalado por los investigadores.

ENTREGA DE LA PULSERA

| Firma: | Fecha: |
| --- | --- |

DEVOLUCIÓN DE LA PULSERA

| Firma: | Fecha: |
| --- | --- |

**Grupo de Investigación en Fisioterapia de la** **Universidad de** (*información cegada*)

Dirección de contacto del Investigador y/o del Grupo responsables de la investigación y del tratamiento de los datos:

(*información cegada*)
